# Supplementary material for: Diversity and Phylogeny of Cattle Ixodid Ticks and Associated Spotted Fever Group Rickettsia spp. in Tunisia
Source: MDPI journal article supplement (doi:10.3390/pathogens12040552), 2023-04-03
Supplement: s1 [file s1]

**Table S1.** Designation, information on the origins, and mitochondrial 16S rRNA genotypes of the remaining Tunisian isolates of *Hyalomma marginatum* ticks infesting cattle.

| Sample  | Location       | <i>Rickettsia</i> (+/-) | Morphologically identified tick species | BLAST analysis of mito 16S rRNA (Genotype)         |
|---------|----------------|-------------------------|-----------------------------------------|----------------------------------------------------|
| Hyma76  | Bjaoua         | <i>Rickettsia</i> +     | <i>Hyalomma</i> sp.                     | 100% <i>Hy. marginatum</i> (OQ109207, Hymar16SG1)  |
| Hyma2   | K. El Andalous | <i>Rickettsia</i> -     | <i>Hyalomma</i> sp.                     | 100% <i>Hy. marginatum</i> (OQ109208, Hymar16SG1)  |
| Hyma4   | K. El Andalous | <i>Rickettsia</i> -     | <i>Hyalomma</i> sp.                     | 100% <i>Hy. marginatum</i> (OQ109209, Hymar16SG1)  |
| Hyma130 | Sidi Othmen    | <i>Rickettsia</i> -     | <i>Hyalomma</i> sp.                     | 100% <i>Hy. marginatum</i> (OQ109210, Hymar16SG1)  |
| Hyma246 | M. Bourguiba   | <i>Rickettsia</i> -     | <i>Hyalomma</i> sp.                     | 100% <i>Hy. marginatum</i> (OQ109211, Hymar16SG1)  |
| Hyma139 | Sidi Othmen    | <i>Rickettsia</i> -     | <i>Hy. marginatum</i>                   | 99.6% <i>Hy. marginatum</i> (OQ109212, Hymar16SG2) |

Abbreviations: *Rickettsia* (+/-): Positive or negative to *Rickettsia* spp. *ompB* PCR; K. El Andalous: Kalâat El Andalous; M. Bourguiba : Menzel Bourguiba; mito 16S rRNA: mitochondrial 16S rRNA.

**Table S2.** Designation, information on the origins, and mitochondrial 16S rRNA genotypes of the remaining Tunisian isolates of *Hyalomma excavatum* ticks infesting cattle.

| Sample  | Location       | <i>Rickettsia</i> (+/-) | Morphologically identified tick species | BLAST analysis of mito 16S rRNA (Genotype)        |
|---------|----------------|-------------------------|-----------------------------------------|---------------------------------------------------|
| Hyex15  | K. El Andalous | <i>Rickettsia</i> -     | <i>Hy. excavatum</i>                    | 99.6% <i>Hy. excavatum</i> (OQ109234, Hyexc16SG2) |
| Hyex93  | Jdaida         | <i>Rickettsia</i> -     | <i>Hy. excavatum</i>                    | 99.2% <i>Hy. excavatum</i> (OQ109235, Hyexc16SG1) |
| Hyex29  | Sejnane        | <i>Rickettsia</i> -     | <i>Hy. excavatum</i>                    | 99.6% <i>Hy. excavatum</i> (OQ109236, Hyexc16SG2) |
| Hyex30  | Joumine        | <i>Rickettsia</i> -     | <i>Hy. excavatum</i>                    | 99.6% <i>Hy. excavatum</i> (OQ109237, Hyexc16SG2) |
| Hyex159 | Jdaida         | <i>Rickettsia</i> -     | <i>Hy. excavatum</i>                    | 99.2% <i>Hy. excavatum</i> (OQ109238, Hyexc16SG1) |
| Hyex233 | Jdaida         | <i>Rickettsia</i> -     | <i>Hy. excavatum</i>                    | 99.2% <i>Hy. excavatum</i> (OQ109239, Hyexc16SG1) |
| Hyex138 | Sidi Othmen    | <i>Rickettsia</i> -     | <i>Hy. excavatum</i>                    | 99.2% <i>Hy. excavatum</i> (OQ109240, Hyexc16SG1) |
| Hyex66  | M. Bourguiba   | <i>Rickettsia</i> -     | <i>Hyalomma</i> sp.                     | 99.2% <i>Hy. excavatum</i> (OQ109241, Hyexc16SG1) |
| Hyex65  | M. Bourguiba   | <i>Rickettsia</i> -     | <i>Hy. excavatum</i>                    | 99.6% <i>Hy. excavatum</i> (OQ109242, Hyexc16SG2) |
| Hyex150 | Sidi Othmen    | <i>Rickettsia</i> -     | <i>Hy. excavatum</i>                    | 99.2% <i>Hy. excavatum</i> (OQ109243, Hyexc16SG1) |

Abbreviations: *Rickettsia* (+/-): Positive or negative to *Rickettsia* spp. *ompB* PCR; K. El Andalous: Kalâat El Andalous; M. Bourguiba: Menzel Bourguiba; mito 16S rRNA: mitochondrial 16S rRNA.

**Table S3.** Designation, information on the origins, and mitochondrial 16S rRNA genotypes of Tunisian isolates of *Hyalomma scupense* ticks infesting cattle.

| Sample  | Location    | <i>Rickettsia</i> (+/-) | Morphologically identified tick species | BLAST analysis of mito 16S rRNA (Genotype)      |
|---------|-------------|-------------------------|-----------------------------------------|-------------------------------------------------|
| Hysc136 | Sidi Othmen | <i>Rickettsia</i> -     | <i>Hyalomma</i> sp.                     | 100% <i>Hy. scupense</i> (OQ109245, Hyscu16SG1) |
| Hysc40  | Mabtouh     | <i>Rickettsia</i> -     | <i>Hy. scupense</i>                     | 100% <i>Hy. scupense</i> (OQ109246, Hyscu16SG1) |
| Hysc38  | Mabtouh     | <i>Rickettsia</i> +     | <i>Hyalomma</i> sp.                     | 100% <i>Hy. scupense</i> (OQ109247, Hyscu16SG1) |
| Hysc105 | Dhniba      | <i>Rickettsia</i> -     | <i>Hy. scupense</i>                     | 100% <i>Hy. scupense</i> (OQ109248, Hyscu16SG1) |
| Hysc22  | Sejnane     | <i>Rickettsia</i> -     | <i>Hyalomma</i> sp.                     | 100% <i>Hy. scupense</i> (OQ109249, Hyscu16SG1) |

|         |          |                     |                     |                                                 |
|---------|----------|---------------------|---------------------|-------------------------------------------------|
| Hysc33  | Mabtouh  | <i>Rickettsia</i> - | <i>Hy. scupense</i> | 100% <i>Hy. scupense</i> (OQ109250, Hyscu16SG1) |
| Hysc37  | Mabtouh  | <i>Rickettsia</i> - | <i>Hyalomma</i> sp. | 100% <i>Hy. scupense</i> (OQ109251, Hyscu16SG1) |
| Hysc71  | Tebourba | <i>Rickettsia</i> - | <i>Hy. scupense</i> | 100% <i>Hy. scupense</i> (OQ109252, Hyscu16SG1) |
| Hysc103 | Dhniba   | <i>Rickettsia</i> - | <i>Hyalomma</i> sp. | 100% <i>Hy. scupense</i> (OQ109253, Hyscu16SG1) |
| Hysc104 | Dhniba   | <i>Rickettsia</i> - | <i>Hyalomma</i> sp. | 100% <i>Hy. scupense</i> (OQ109254, Hyscu16SG1) |
| Hysc106 | Dhniba   | <i>Rickettsia</i> - | <i>Hyalomma</i> sp. | 100% <i>Hy. scupense</i> (OQ109255, Hyscu16SG1) |
| Hysc42  | Mabtouh  | <i>Rickettsia</i> - | <i>Hyalomma</i> sp. | 100% <i>Hy. scupense</i> (OQ109256, Hyscu16SG1) |

Abbreviations: *Rickettsia* (+/-): Positive or negative to *Rickettsia* spp. *ompB* PCR.

**Table S4.** Designation, information on the origins, and mitochondrial 16S rRNA genotypes of the remaining Tunisian isolates of *Rhipicephalus sanguineus* sensu lato ticks infesting cattle.

| Sample  | Location     | <i>Rickettsia</i><br>(+/-) | Morphologically<br>identified tick species | BLAST analysis of mito 16S rRNA (Genotype)        |
|---------|--------------|----------------------------|--------------------------------------------|---------------------------------------------------|
| Rhsa292 | M. Bourguiba | <i>Rickettsia</i> +        | <i>Rh. sang</i> s.l.                       | 100% <i>Rh. sang</i> s.l. (OQ109269, Rhsang16SG1) |
| Rhsa277 | M. Bourguiba | <i>Rickettsia</i> +        | <i>Rh. sang</i> s.l.                       | 100% <i>Rh. sang</i> s.l. (OQ109270, Rhsang16SG1) |
| Rhsa272 | M. Bourguiba | <i>Rickettsia</i> +        | <i>Rh. sang</i> s.l.                       | 100% <i>Rh. sang</i> s.l. (OQ109271, Rhsang16SG1) |

Abbreviations: *Rickettsia* (+/-): Positive or negative to *Rickettsia* spp. *ompB* PCR; *Rh. sang* s.l.: *Rhipicephalus sanguineus* sensu lato; M. Bourguiba: Menzel Bourguiba; mito 16S rRNA: mitochondrial 16S rRNA.
